# Supplementary material for: G-quadruplex ligands mediate downregulation of DUX4 expression
Source: PubMed Central journal article supplement — Nucleic Acids Res. 2020 Mar 17;48(8):4179–94. doi: 10.1093/nar/gkaa146 (PMC7192601; doi:10.1093/nar/gkaa146), 2020-03-17
Supplement: gkaa146_supplemental_file.pdf [file gkaa146_supplemental_file.pdf]

## Supplementary Figure 1

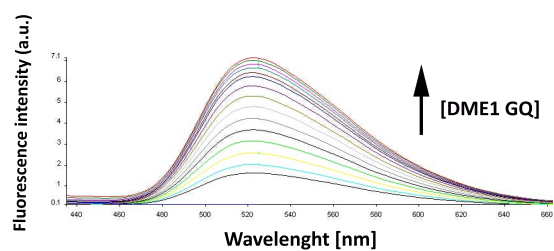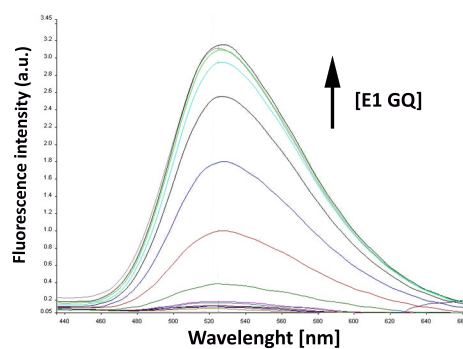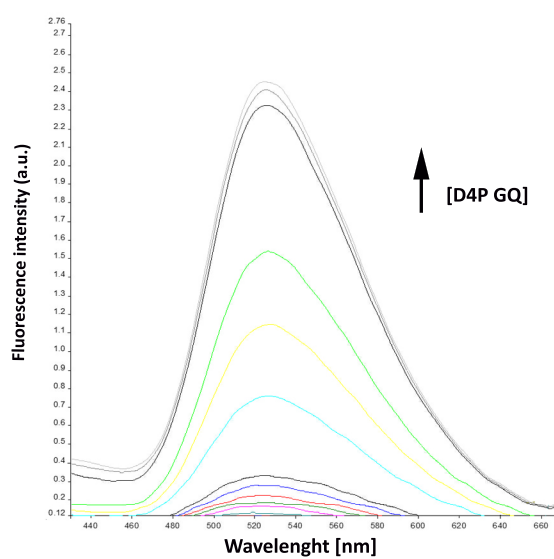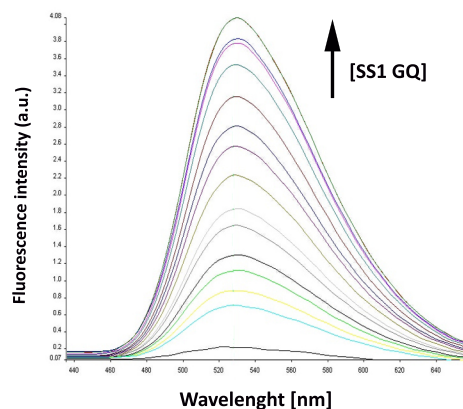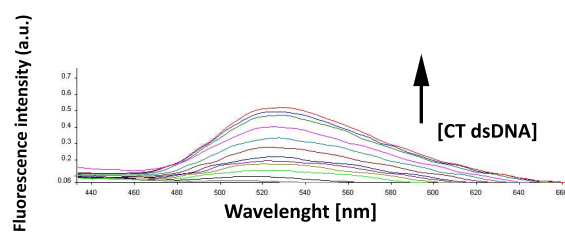

**Supp. 1:** Fluorescence spectra of berberine ( $0.5 \mu\text{M}$ ) in the presence of increasing concentrations of DME1, D4P, CT dsDNA, E1 and SS1 GQ oligonucleotides ( $0-10 \mu\text{M}$ ), in Tris-HCl ( $10 \text{ mM}$ ), KCl ( $100 \text{ mM}$ ) pH  $7.0$ , measured at room temperature. Abbreviations: arbitrary units, a.u.
